# Supplementary material for: Rainfall redistribution in subtropical Chinese forests changes over 22 years
Source: Copernicus journal article supplement (doi:10.5194/egusphere-2023-2789), 2023-12-08
Supplement: Supplementary file 1 [file egusphere-2023-2789-supplement.pdf]

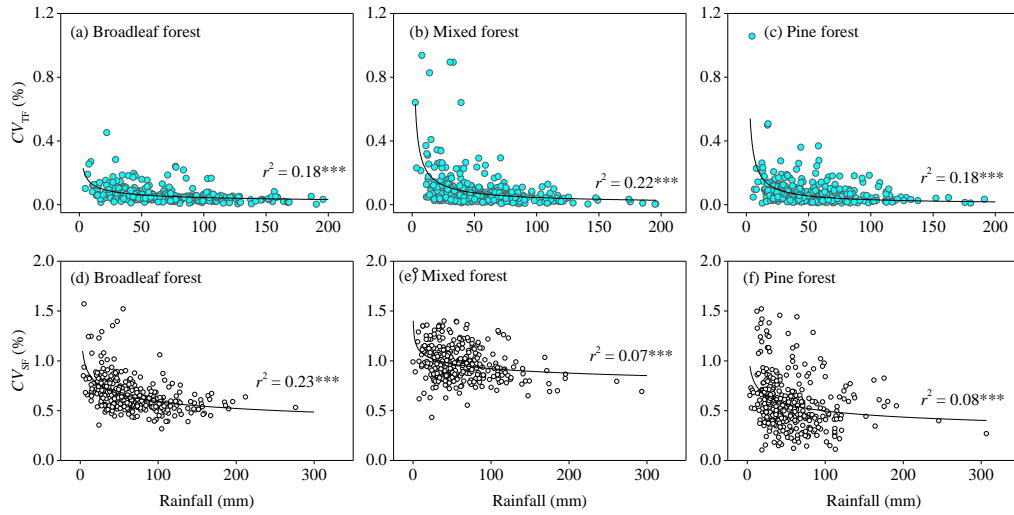

**Fig. S1** Coefficient of variation changing of throughfall ratio (a~c) and stemflow ratio (d~f) with rainfall volume.  $r$ : Pearson coefficient of correlation; \*:  $P < 0.05$ , \*\*:  $P < 0.01$ , \*\*\*:  $P < 0.001$
